# Supplementary material
Source: PubMed Central journal article supplement (PMC10465459)
Supplement: 12264_2023_1050_MOESM1_ESM.pdf [file 12264_2023_1050_MOESM1_ESM.pdf]

# Supplementary Materials

## Supplementary Figures

**A**

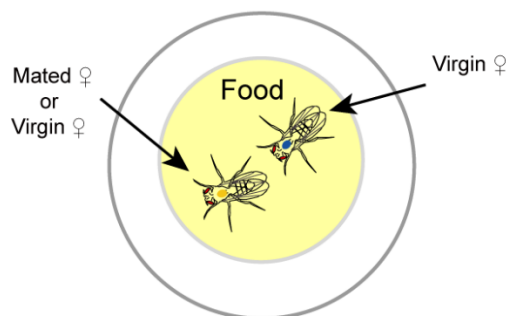

**B**

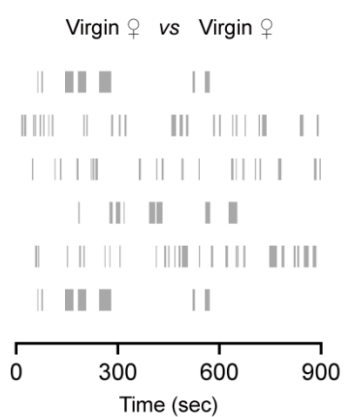

**B'**

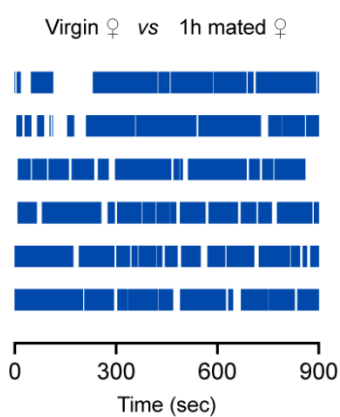

**B''**

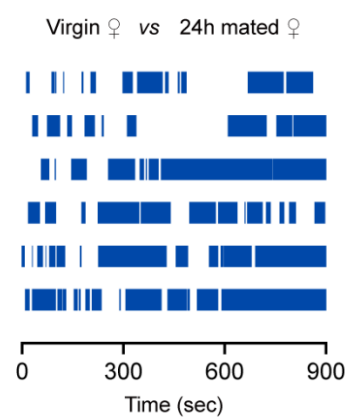

**B'''**

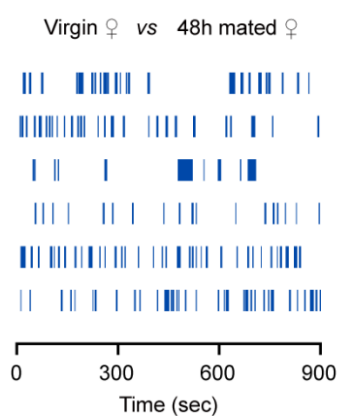

**B''''**

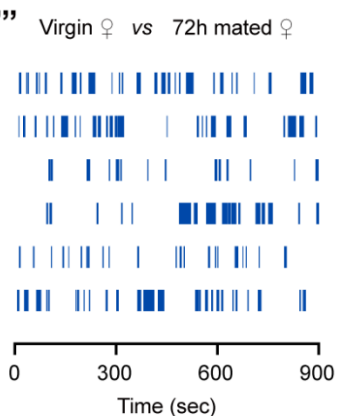

**C**

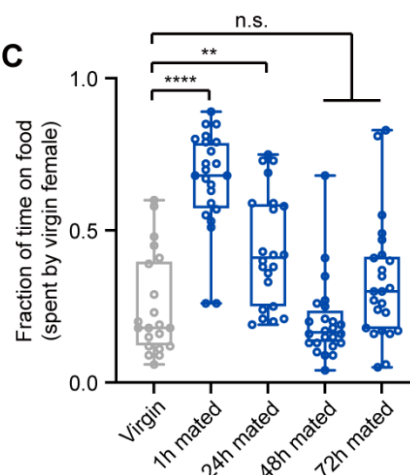

**D**

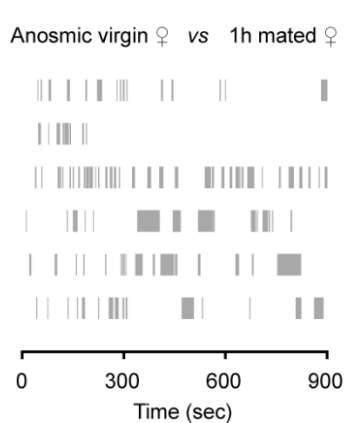

**D'**

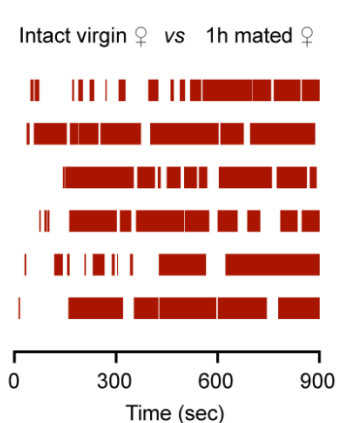

**E**

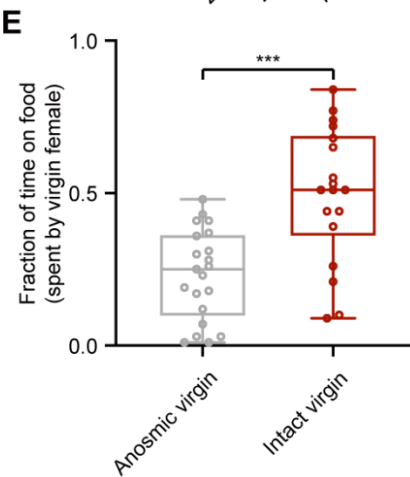

**Fig. S1** Virgin females spend more time on food when paired with mated females than with virgin females. **A** Experimental schematic. A virgin female is paired with another virgin female or a mated female. **B–B''''** Simultaneous monitoring of representative individual virgin females on food plates for 15 min when they are paired with virgin, 1 h mated, 24 h mated, 48 h mated, or 72 h mated females ( $n = 6$ ). **C** Fraction of time each virgin female spent on the food plate. Competitors of virgin females are indicated under the plot ( $n = 21-23$ ). **D, D'** Simultaneous monitoring of representative individual intact or anosmic virgin females on the food plate for 15 min when they were paired with 1 h mated females ( $n = 6$ ). **E** Fraction of time each virgin female spent on the food plate. Competitors of 1 h mated females are indicated under the plot ( $n = 18-21$ ).  $**P < 0.01$ ,  $***P < 0.001$ ,  $****P < 0.0001$ , otherwise no significant difference (Kruskal-Wallis with Dunn's multiple-comparison *post hoc* test for **C**; Mann-Whitney U test for **E**). Error bars,  $\pm$  SEM.

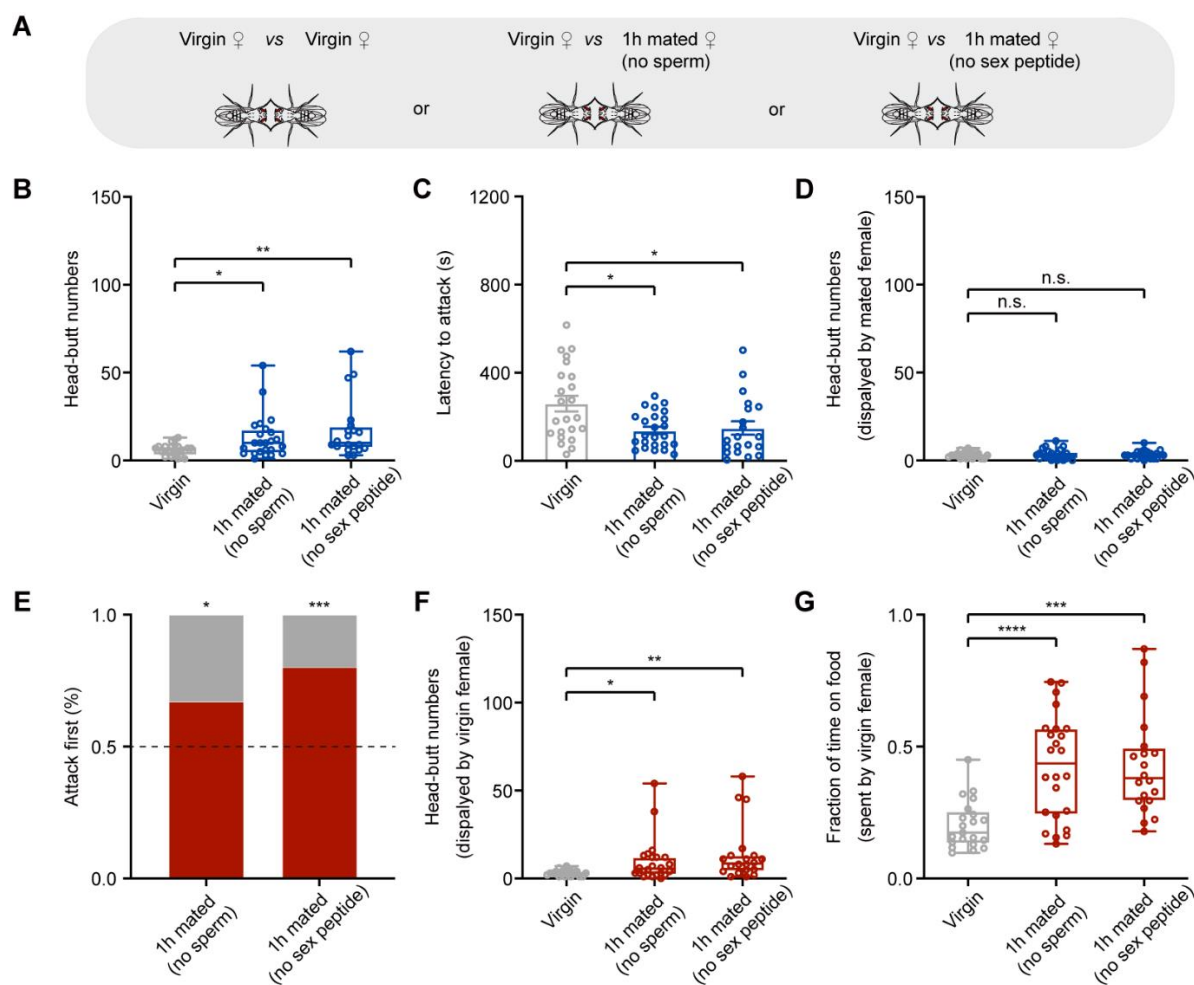

**Fig. S2** Sex peptide and sperm do not influence virgin female aggression. **A** Experimental schematic. A virgin female is paired with another virgin female or a mated female without sperm or sex peptide. **B, C** Head-butt numbers and latency by a pair of female flies. Competitors of virgin females are indicated under the plot. **D** Head-butt numbers by 1 h mated females. **E** Percentages of initiating attack by virgin females (gray bars) and mated females (red bars). **F** Head-butt numbers by virgin females. **G** Fraction of time each virgin female spent on the food plate ( $n = 20-24$ ). Competitors of virgin females are indicated under the plot.  $*P < 0.05$ ,  $**P < 0.01$ ,  $****P < 0.0001$ , otherwise no significant difference (Kruskal-Wallis with Dunn's multiple-comparison post hoc test for **B, C, D, F**, and **G**;  $\chi^2$  test for **E**). Error bars,  $\pm$  SEM.

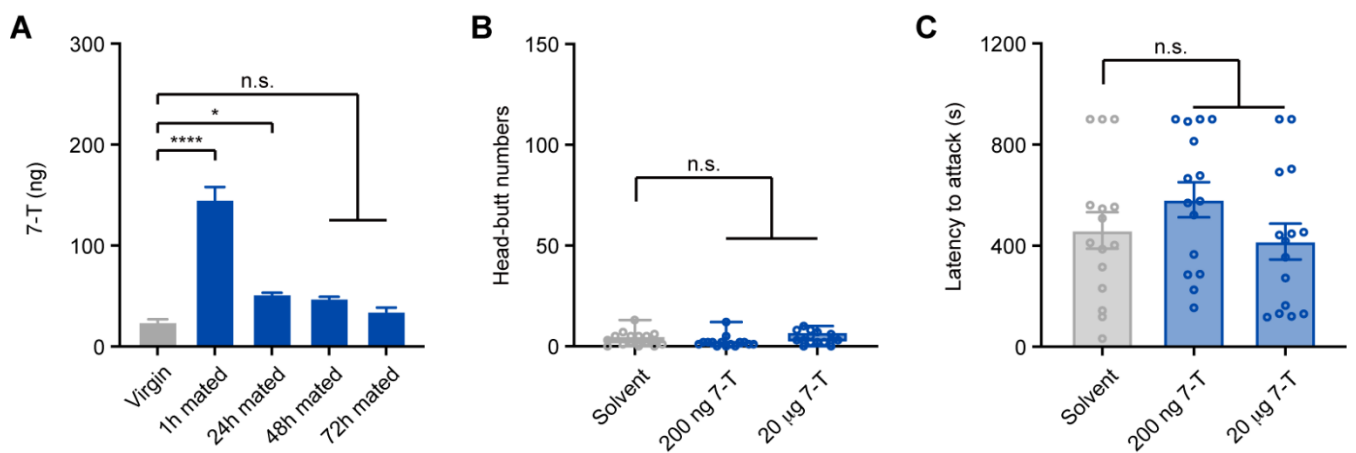

**Fig. S3** 7-T does not affect virgin female aggression. **A** Quantification of 7-T in extracts of virgin and mated single flies ( $n = 6$ ). **B, C** Head-butt numbers and latency by a pair of virgin female flies by application of 200 ng and 20  $\mu$ g 7-T, or solvent ( $n = 15$ ).  $*P < 0.05$ ,  $****P < 0.0001$ , otherwise no significant difference (one-way ANOVA with Tukey's post hoc test for **A**; Kruskal-Wallis with Dunn's multiple-comparison *post hoc* test for **B, C**). Error bars,  $\pm$  SEM.

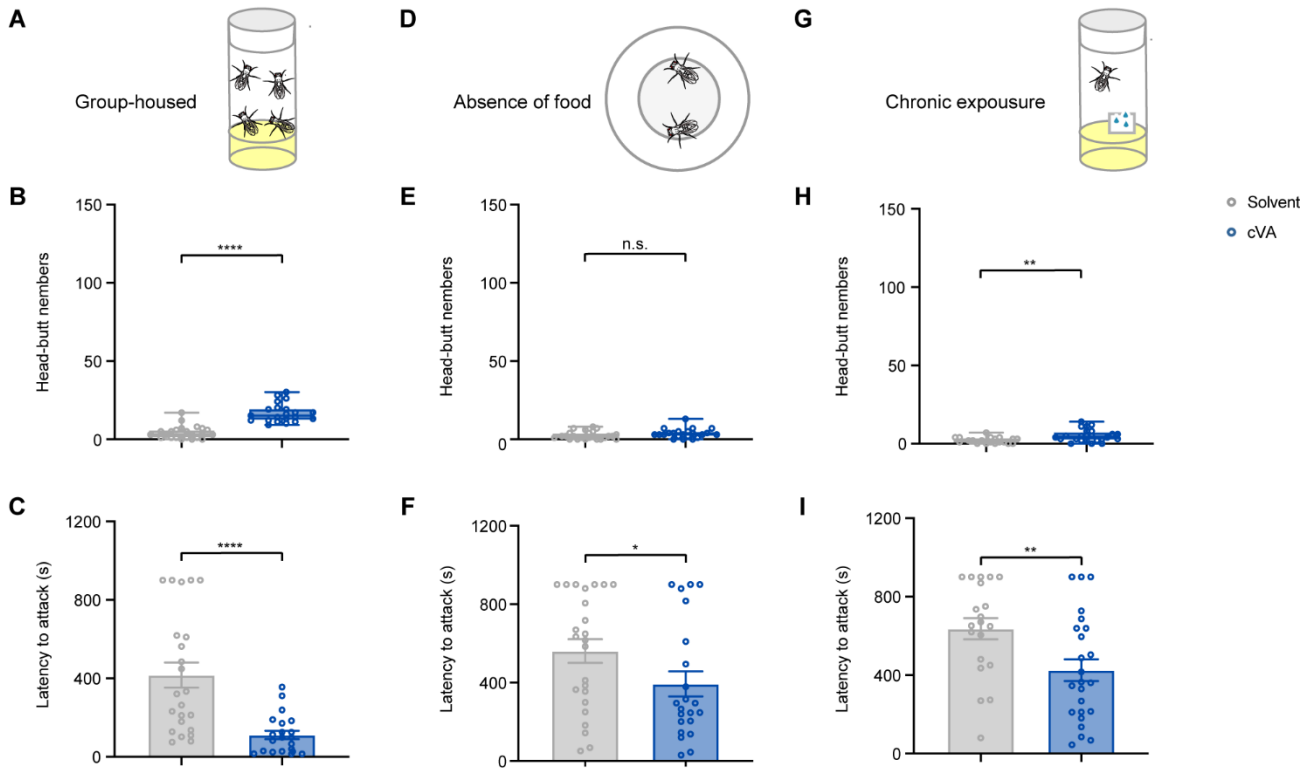

**Fig. S4** Other contextual influences on cVA-induced virgin female aggression. **A** Schematic of group-housed treatment. **B, C** Head-butt numbers and latency by two group-housed virgin females by application of 50  $\mu$ g cVA or solvent ( $n = 21-23$ ). **D** Schematic of aggressive behavior in which two virgin females are paired together on an agarose plate. **E, F** Head-butt numbers and latency by two virgin females on an agarose plate by application of 50  $\mu$ g cVA or solvent ( $n = 22-24$ ). **G** Schematic of experimental treatment. Virgin females are chronically exposed to solvent or cVA for 24 h. **H, I** Head-butt numbers and latency by virgin females after pre-exposure to solvent or cVA for 24 h ( $n = 20-24$ ). \* $P < 0.05$ , \*\* $P < 0.01$ , \*\*\*\* $P < 0.0001$ , otherwise no significant difference (Mann-Whitney U test for **B, C, E, F, H, and I**). Error bars,  $\pm$  SEM.

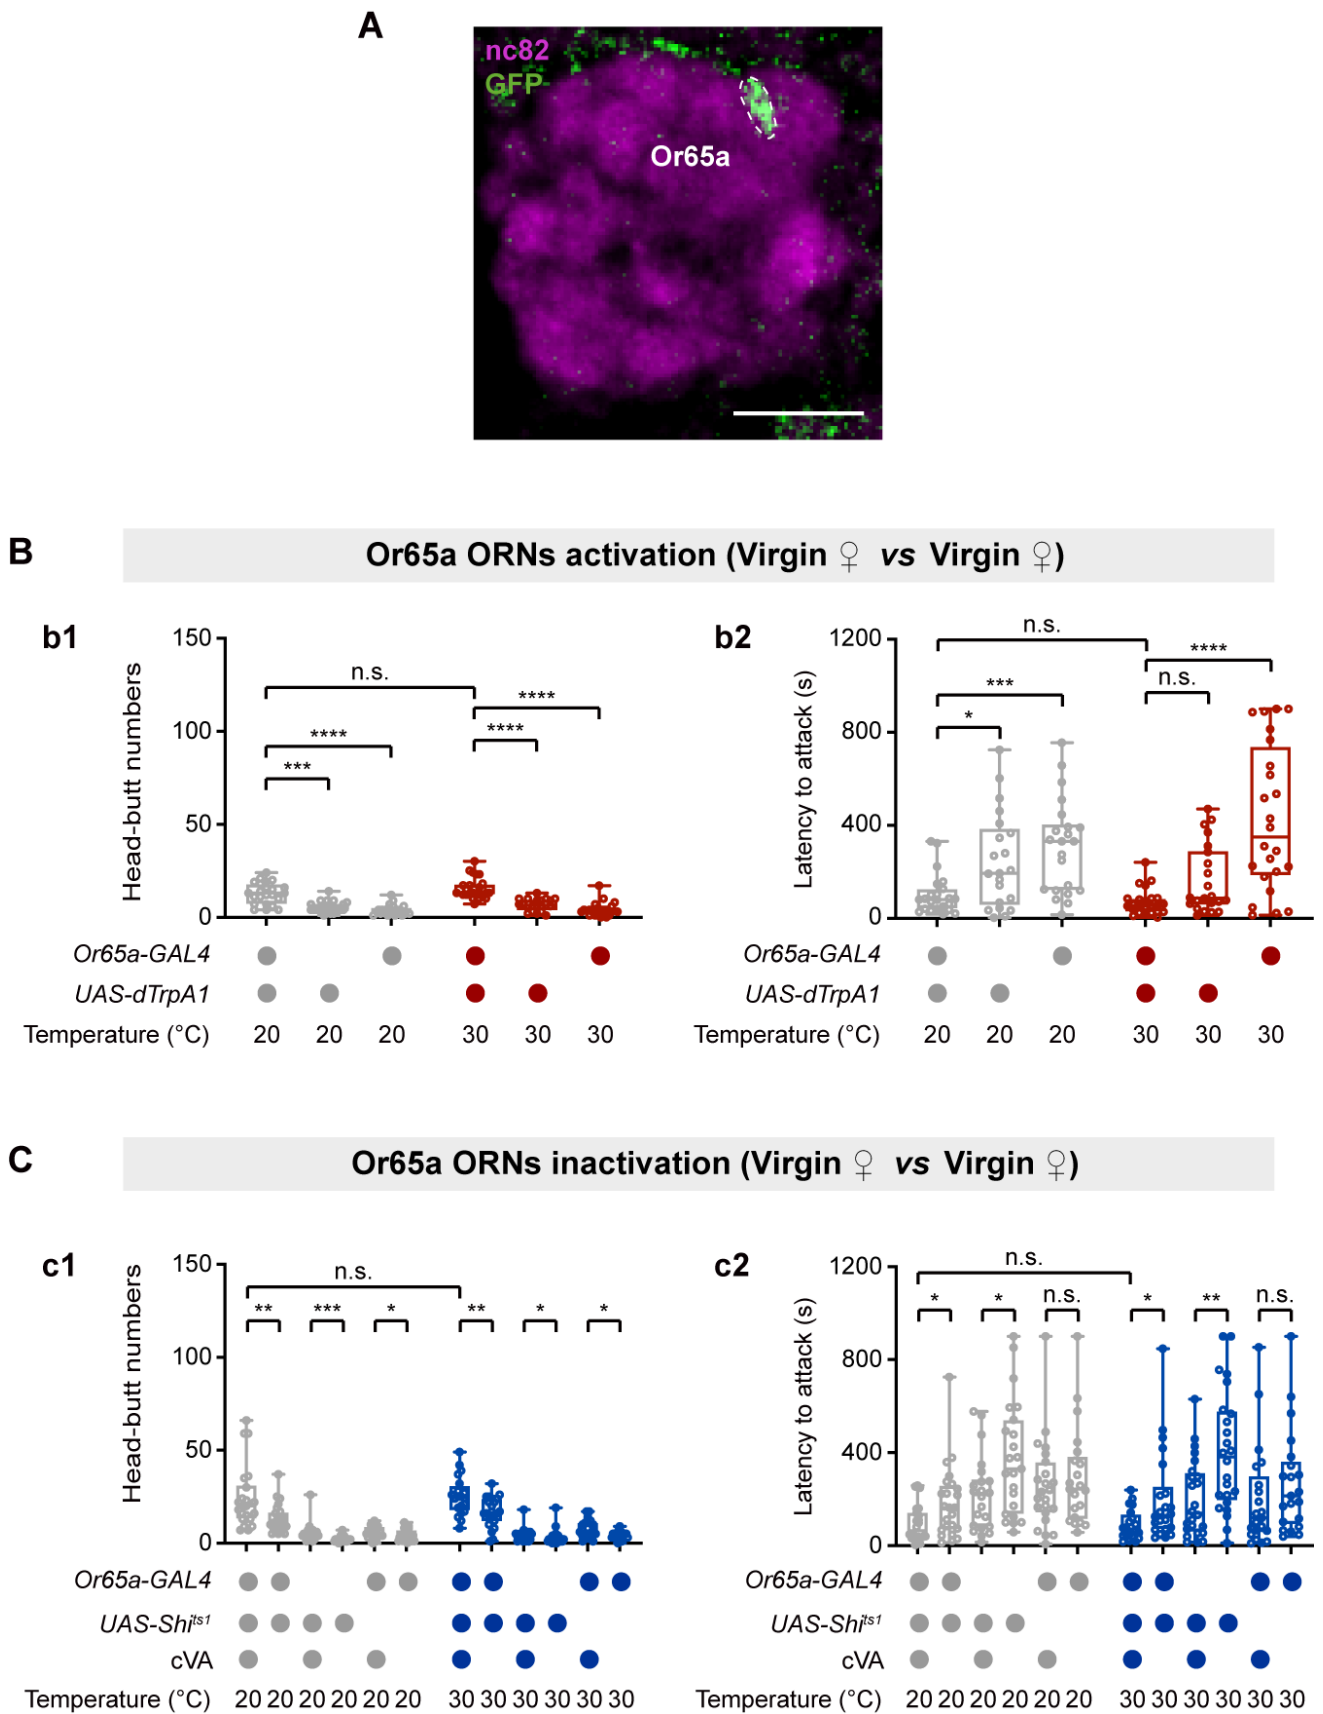

**Fig. S5** Or65a ORNs do not regulate cVA-induced virgin female aggression. **A** Confocal image of the antennal lobe. *Or65a-GAL4* labeled Or65a ORNs in the female brain (green: DL3 glomerulus); nc82, neuropil marker (magenta). Scale bar, 20  $\mu$ m. **B** Head-butt numbers (**b1**) and latency (**b2**) by virgin

females during dTrpA1-mediated thermogenetic activation of Or65a ORNs ( $n = 21-24$ ). **C** Head-butt numbers (**c1**) and latency (**c2**) by virgin females during *Shibire<sup>ts1</sup>*-mediated inactivation of Or65a ORNs by application of 50  $\mu\text{g}$  cVA or solvent ( $n = 20-24$ ). \* $P < 0.05$ , \*\* $P < 0.01$ , \*\*\* $P < 0.001$ , \*\*\*\* $P < 0.0001$ , otherwise no significant difference (Kruskal-Wallis with Dunn's multiple-comparison post hoc test for **B**, **C**). Error bars,  $\pm$  SEM.

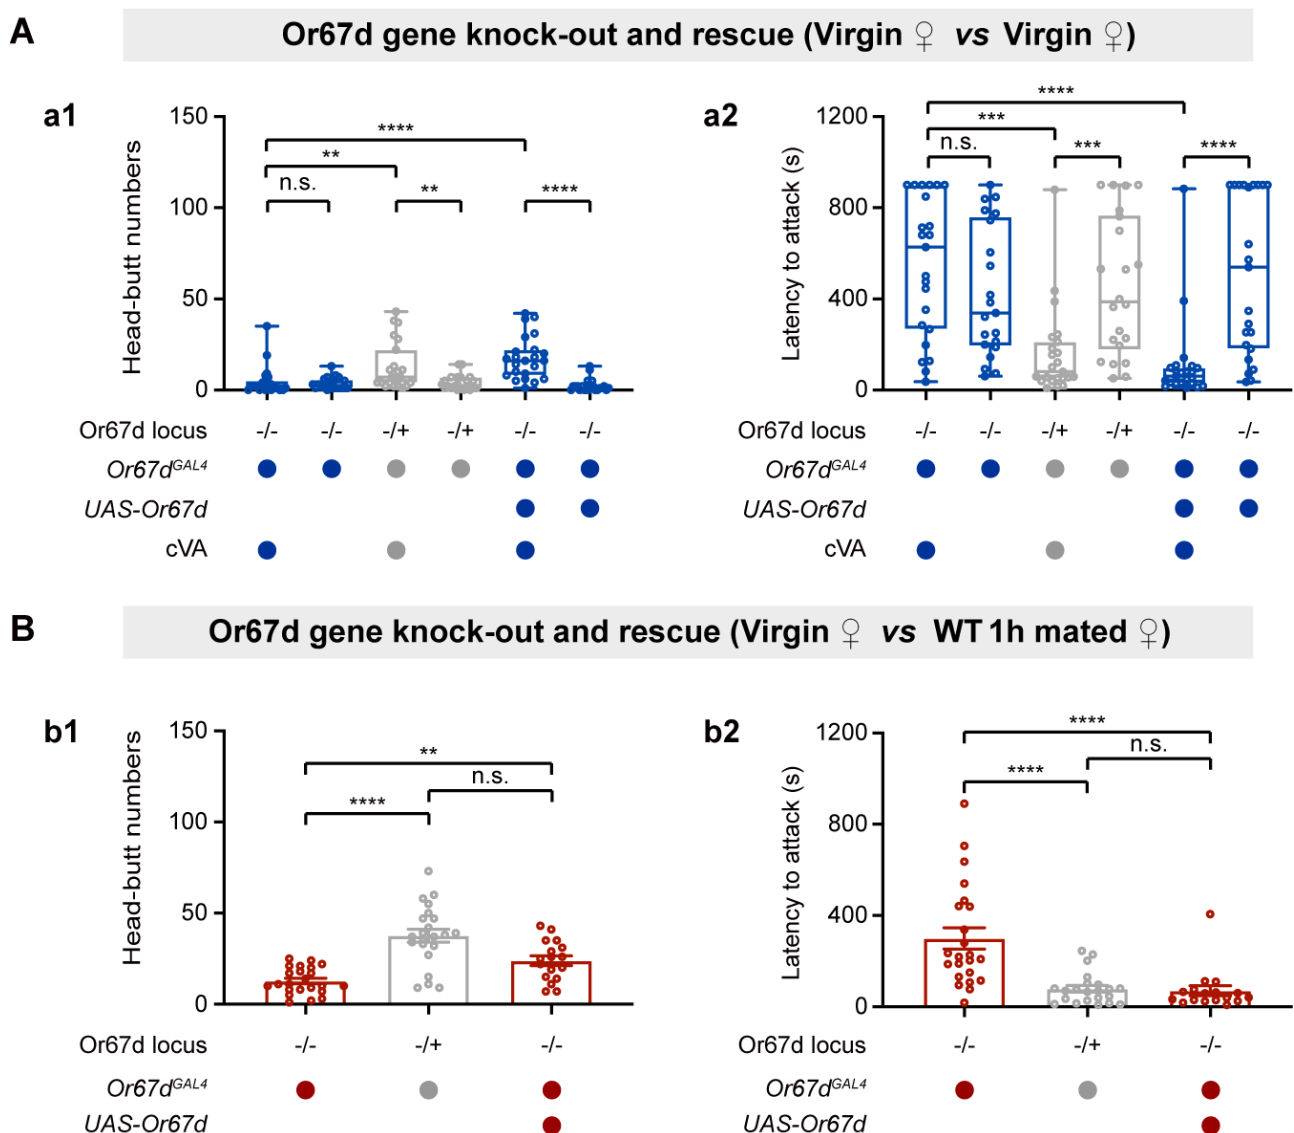

**Fig. S6** The *Or67d* gene is required for cVA-induced virgin female aggression. **A** cVA-induced virgin female aggression is suppressed in *Or67d* mutants and is rescued by the expression of *UAS-Or67d* under the control of *Or67d-GAL4* in *Or67d* mutants. (**a1**) Head-butt numbers; (**a2**) latency ( $n = 21-$

23). **B** Head-butt numbers (**b1**) and latency (**b2**) by virgin females toward wild-type 1 h mated females ( $n = 17-23$ ). Genotypes of virgin females are indicated below the plot. \* $P < 0.05$ , \*\* $P < 0.01$ , \*\*\* $P < 0.001$ , \*\*\*\* $P < 0.0001$ , otherwise no significant difference (Kruskal-Wallis with Dunn's multiple-comparison post hoc test for **A**, **B**). Error bars,  $\pm$  SEM.

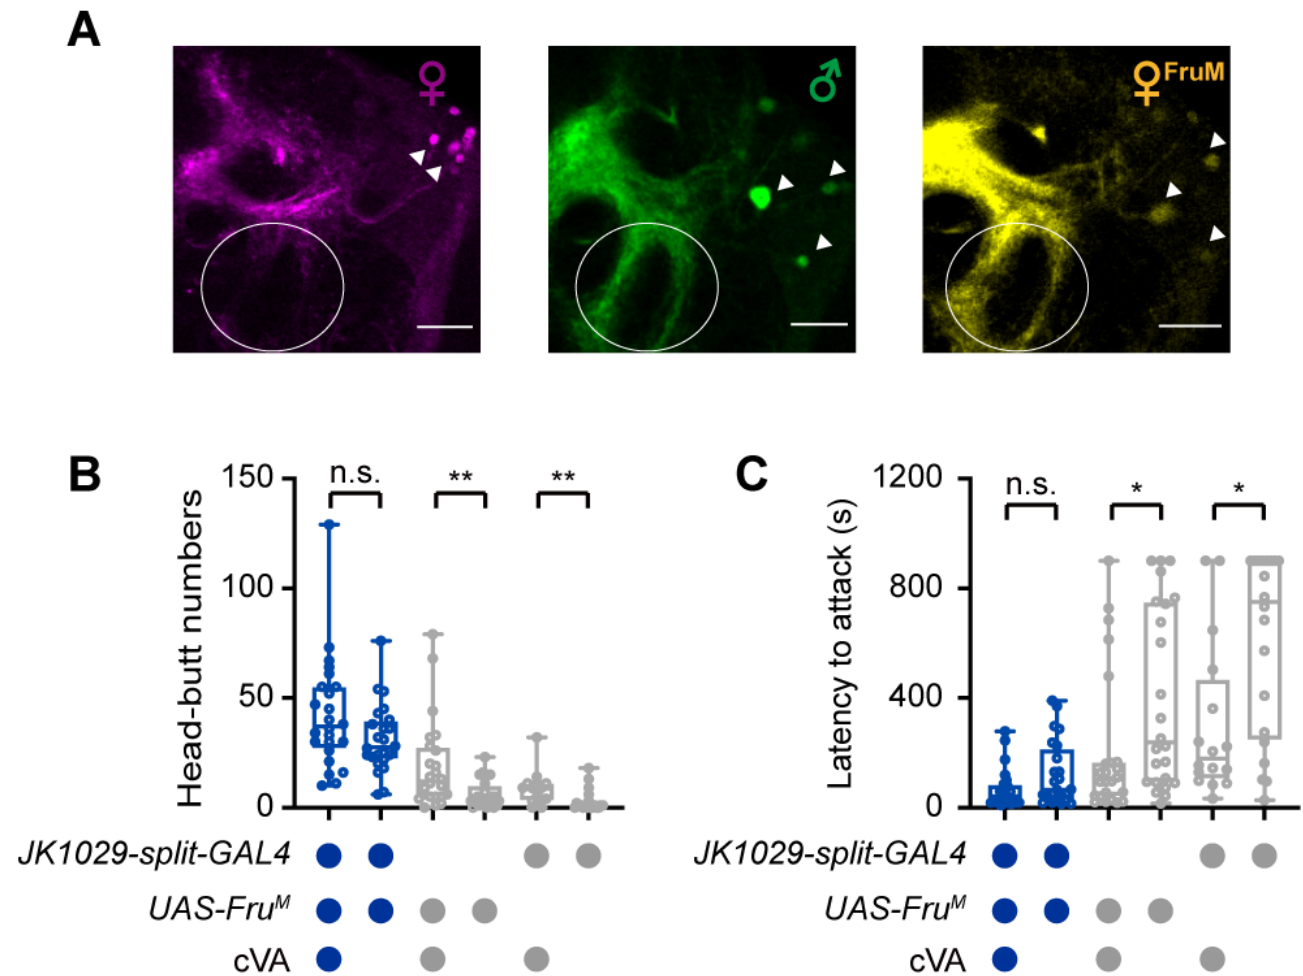

**Fig. S7** Expression of Fru<sup>M</sup> in aSP-g neurons suppresses cVA-induced virgin female aggression.

**A** Neurites and cell bodies in the lateral horn region of aSP-g neurons in a female (left), a male (middle), and a Fru<sup>M</sup> mutant female (right). White circles indicate neurites; white arrowheads indicate cell bodies.

**B**, **C** Head-butt numbers and latency by virgin females with masculinized aSP-g neurons by application of 50  $\mu$ g cVA or solvent ( $n = 16-24$ ). \* $P < 0.05$ , \*\* $P < 0.01$ , otherwise no significant difference (Mann-Whitney U test for **B**, **C**). Error bars,  $\pm$  SEM.



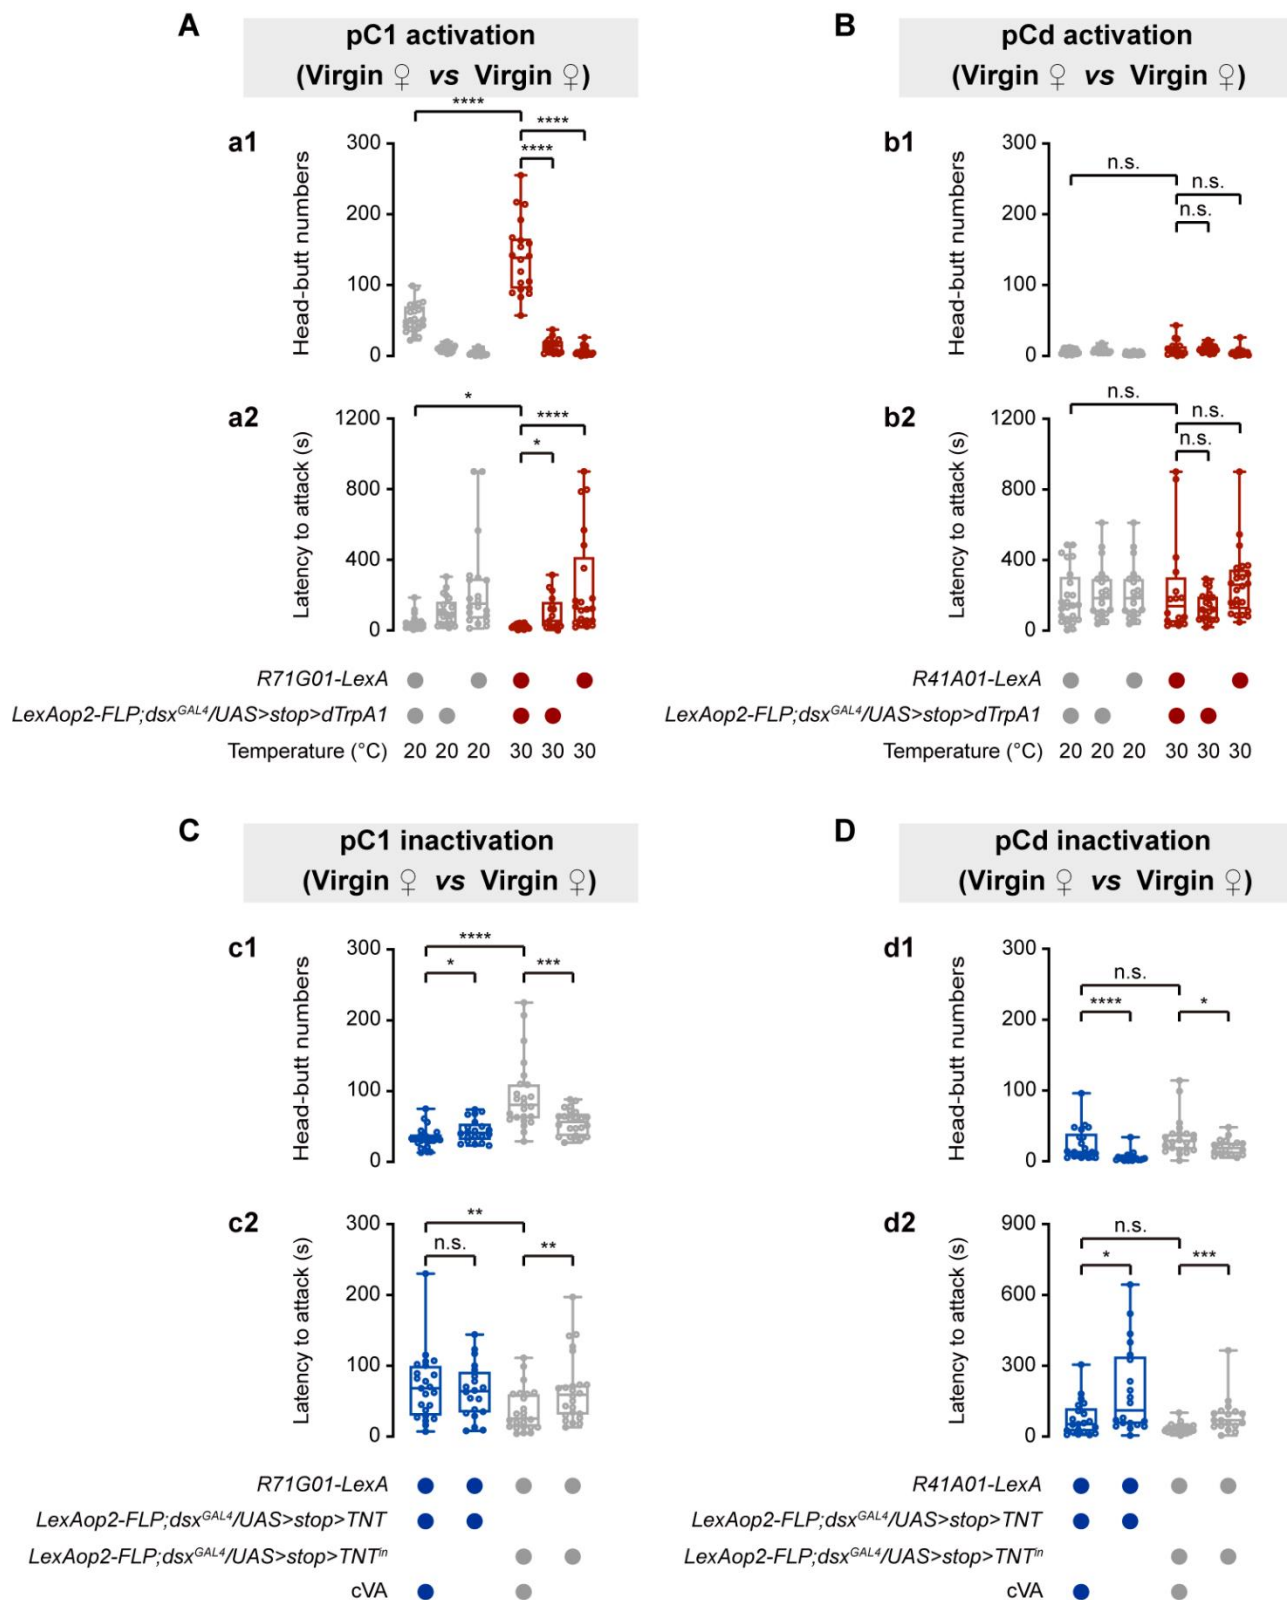

**Fig. S8** pC1 neurons, rather than pCd neurons, regulate virgin female aggression. **A** Activation of pC1 neurons labeled by the genetic intersection of *71G01-LexA/LexAop2-FLP; dsx<sup>GAL4</sup>/UAS > stop > dTrpA1* increases virgin female aggression. (**a1**) Head-butt numbers; (**a2**) latency ( $n = 17-24$ ). **B** Activation of pCd neurons labeled by the genetic intersection of *41A01-LexA/LexAop2-FLP;*



*dsx<sup>GALA</sup>/UAS > stop > dTrpA1* does not increase virgin female aggression. **(b1)** Head-butt numbers; **(b2)** latency ( $n = 16-24$ ). **C** Expressing TNT in pC1 neurons inhibits cVA-induced virgin female aggression. **(c1)** Head-butt numbers; **(c2)** latency ( $n = 20-24$ ). **D** Expression of TNT in pCd neurons does not influence cVA-induced virgin female aggression. **(d1)** Head-butt numbers; **(d2)** latency ( $n = 18-22$ ). \* $P < 0.05$ , \*\* $P < 0.01$ , \*\*\* $P < 0.001$ , \*\*\*\* $P < 0.0001$ , otherwise no significant difference (Kruskal-Wallis with Dunn's multiple-comparison post hoc test for **A-D**). Error bars,  $\pm$  SEM.

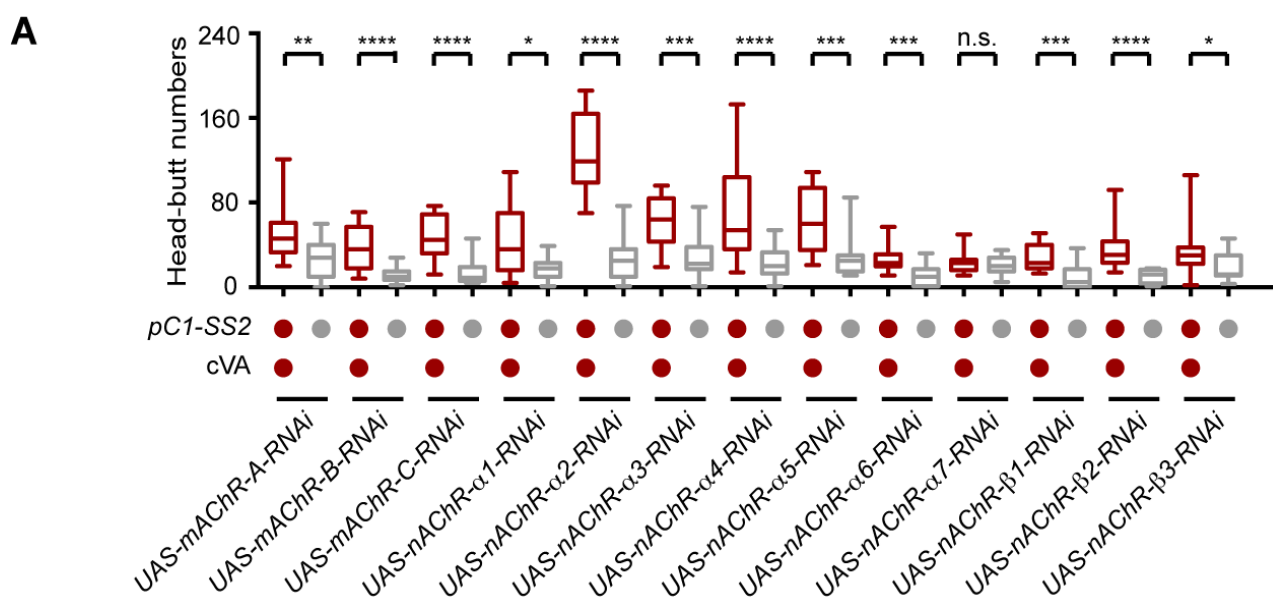

**Fig. S9** Screening mAChRs and nAChRs in pC1 neurons. **A** Head-butt numbers by virgin female flies with RNAi-mediated nAChR or mAChR knockdown in the presence of 50  $\mu$ g cVA or solvent ( $n = 15-21$ ). \* $P < 0.05$ , \*\* $P < 0.01$ , \*\*\* $P < 0.001$ , \*\*\*\* $P < 0.0001$ , otherwise no significant difference (Mann-Whitney U test for **A**). Error bars,  $\pm$  SEM.

## Supplementary Tables

**Table S1** Quantification of cuticular hydrocarbons in virgin and 1–72 h mated females

| Compound name              | Mean $\pm$ SEM (ng)   |                        |                        |                        |                       | <i>F</i> | <i>P</i> value |
|----------------------------|-----------------------|------------------------|------------------------|------------------------|-----------------------|----------|----------------|
|                            | Virgin (6)            | 1 h mated (6)          | 24 h mated (6)         | 48 h mated (6)         | 72 h mated (6)        |          |                |
| cis-Vaccenyl Acetate (cVA) | 0                     | 511.3 $\pm$ 35.29 (A)  | 68.82 $\pm$ 4.842 (B)  | 41.77 $\pm$ 2.358 (B)  | 19.31 $\pm$ 3.044 (B) | 181.2    | <0.0001        |
| 7-Tricosene                | 24.16 $\pm$ 2.953 (A) | 145.5 $\pm$ 12.6 (B)   | 51.63 $\pm$ 1.79 (C)   | 47.7 $\pm$ 1.651 (AC)  | 34.6 $\pm$ 4.138 (AC) | 62       | <0.0001        |
| n-Tricosene                | 143.6 $\pm$ 15.68     | 173.2 $\pm$ 15.91      | 162.3 $\pm$ 12.94      | 175.4 $\pm$ 7.812      | 185.2 $\pm$ 15.43     | 1.303    | 0.2959         |
| n-Tetracosane              | 35.44 $\pm$ 2.639 (A) | 32.68 $\pm$ 5.458 (AB) | 49.26 $\pm$ 2.017 (AC) | 59.59 $\pm$ 2.395 (CD) | 67.96 $\pm$ 3.778 (D) | 18.92    | <0.0001        |
| 9-Pentacosene              | 61.36 $\pm$ 9.025     | 60.39 $\pm$ 7.412      | 54.76 $\pm$ 2.894      | 66.69 $\pm$ 4.168      | 66.99 $\pm$ 6.375     | 0.6306   | 0.6452         |
| 7-Pentacosene              | 46.53 $\pm$ 5.532     | 62.86 $\pm$ 6.800      | 47.4 $\pm$ 2.053       | 52.3 $\pm$ 2.197       | 57.02 $\pm$ 6.364     | 1.849    | 0.151          |

|                         |                     |                      |                       |                        |                      |        |        |
|-------------------------|---------------------|----------------------|-----------------------|------------------------|----------------------|--------|--------|
| n-Pentacosene           | 147.8 ±<br>12.7 (A) | 150 ±<br>12.61 (A)   | 165.5±10.24<br>(AB)   | 164 ±<br>9.327<br>(AB) | 203.3 ±<br>14.46 (B) | 3.446  | 0.0225 |
| 7,11-<br>Heptacosadiene | 488 ±<br>48.83 (A)  | 499.4 ±<br>47.17 (A) | 682.1 ±<br>31.68 (AB) | 782 ±<br>52.99 (B)     | 866.3 ±<br>102.1 (B) | 7.508  | 0.0004 |
| 2-methyl-<br>Hexacosane | 91.18 ±<br>6.541    | 80.36 ±<br>8.907     | 85.05 ±<br>16.48      | 96.4 ±<br>9.396        | 94.24 ±<br>10.45     | 0.3726 | 0.8259 |
| 7,11-<br>Nonacosadiene  | 128.1 ±<br>12.21    | 111.3 ±<br>7.263     | 122.7 ±<br>26.53      | 91 ±<br>11.28          | 99.02 ±<br>12.67     | 1.018  | 0.4172 |

Females were either virgin, 1 h mated, 24 h mated, 48 h mated, or 72 h mated. Only compounds detected in different mating statuses are listed in this table. If a specific compound was not detectable in a group (indicated by "0") the mating status was not included in the statistical analysis. Compound annotation with colors indicate: blue, produced by males and transferred to females during copulation; yellow, dienes made specifically by females. One-way ANOVA and Tukey's *post-hoc* pairwise comparison values are shown. Within compounds, groups with significantly different means are indicated with different letters. The number of replicates is indicated between brackets next to each group.

**Table S2** Synaptic connections identified by EM reconstruction

---

|             | post         |             |             |              |             |
|-------------|--------------|-------------|-------------|--------------|-------------|
|             | (Cell ID)    |             |             |              |             |
| pre         | pC1a_R       | pC1b_R      | pC1c_R      | pC1d_R       | pC1e_R      |
| (Cell ID)   | (5813046951) | (267214250) | (267551639) | (5813063587) | (514850616) |
| aSP-g1_R    | 0            | 1           | 0           | 0            | 0           |
| (485775679) |              |             |             |              |             |
| aSP-g1_R    | 0            | 0           | 0           | 0            | 0           |
| (610916994) |              |             |             |              |             |
| aSP-g1_R    | 0            | 0           | 0           | 0            | 0           |
| (485430434) |              |             |             |              |             |
| aSP-g1_R    | 0            | 0           | 0           | 0            | 0           |
| (887148641) |              |             |             |              |             |
| aSP-g1_R    | 0            | 0           | 0           | 0            | 0           |
| (949534412) |              |             |             |              |             |
| aSP-g2_R    | 0            | 11          | 0           | 0            | 0           |
| (421992069) |              |             |             |              |             |
| aSP-g2_R    | 0            | 1           | 0           | 0            | 0           |
| (641278400) |              |             |             |              |             |
| aSP-g2_R    | 0            | 4           | 0           | 0            | 0           |
| (855414220) |              |             |             |              |             |

---

---

|              |   |   |   |   |   |
|--------------|---|---|---|---|---|
| aSP-g2_R     | 0 | 1 | 0 | 0 | 0 |
| (5813115796) |   |   |   |   |   |
| aSP-g3A_R    | 0 | 0 | 0 | 0 | 0 |
| (329919036)  |   |   |   |   |   |
| aSP-g3B_R    | 0 | 0 | 0 | 0 | 0 |
| (485430336)  |   |   |   |   |   |
| aSP-g3B_R    | 0 | 1 | 0 | 0 | 0 |
| (421650982)  |   |   |   |   |   |

---

The number of synaptic connections identified between aSP-g neurons and pC1 neurons. X\_R indicates right-hemisphere X cells (X indicates aSP-g cells or pC1 cells).
